# Supplementary material for: Association of Polygenic Variants Involved in Immunity and Inflammation with Duodenal Ulcer Risk and Their Interaction with Irregular Eating Habits
Source: MDPI journal article supplement (doi:10.3390/nu15020296), 2023-01-06

Supplementary Table S1. Generalized multifactor dimensionality reduction (GMDR) results of multi-locus interaction with genes related to duodenal ulcer risk.

|                                                    | Model 1 |        |         |     | Model 2 |        |         |     |
|----------------------------------------------------|---------|--------|---------|-----|---------|--------|---------|-----|
|                                                    | TRBA    | TEBA   | P value | CVC | TRBA    | TEBA   | P value | CVC |
| <i>PSCA</i> _rs2978977                             | 0.5692  | 0.5701 | 0.001   | 10  | 0.5692  | 0.5701 | 0.001   | 10  |
| <i>FHIT</i> _rs77063016 plus model 1               | 0.5806  | 0.5803 | 0.001   | 10  | 0.5806  | 0.5803 | 0.001   | 10  |
| <i>CD6</i> _rs11230563 plus model 2                | 0.5873  | 0.5781 | 0.001   | 8   | 0.5873  | 0.5781 | 0.001   | 8   |
| <i>ITPR2</i> _rs7309887 plus model 3               | 0.5972  | 0.5596 | 0.001   | 3   | 0.5972  | 0.5596 | 0.001   | 3   |
| <i>TTC33</i> _rs10055925<br><i>FUT2</i> _rs1047781 |         |        |         |     |         |        |         |     |
| <i>LINC01475</i> _rs6584283                        | 0.6214  | 0.5617 | 0.001   | 10  | 0.6214  | 0.5617 | 0.001   | 10  |
| <i>ITPR2</i> _rs7309887<br><i>PSCA</i> _rs2978977  |         |        |         |     |         |        |         |     |
| <i>CD6</i> _rs11230563 plus model 5                | 0.6602  | 0.5566 | 0.001   | 10  | 0.6602  | 0.5566 | 0.001   | 10  |
| <i>FHIT</i> _rs77063016 plus model 6               | 0.7069  | 0.5402 | 0.001   | 10  | 0.7069  | 0.5402 | 0.001   | 10  |
| <i>DNAJC15</i> _rs78141015 plus model 7            | 0.7259  | 0.5352 | 0.001   | 10  | 0.7259  | 0.5352 | 0.001   | 10  |
| <i>LITAF</i> _rs111690253 plus model 8             | 0.7404  | 0.545  | 0.001   | 10  | 0.7404  | 0.545  | 0.001   | 10  |
| <i>CXCR2</i> _rs576376935 plus model 9             | 0.7496  | 0.5425 | 0.001   | 10  | 0.7496  | 0.5425 | 0.001   | 10  |

TRBA, training balanced accuracy; TEBA, testing balanced accuracy; CVC, cross-validated consistency; P-value for assessing the best model. *PSCA*, prostate stem cell antigen; *FHIT*, fragile histidine triad diadenosine triphosphatase; *CD6*, cluster of differentiation 6; *ITPR2*, inositol 1,4,5-trisphosphate receptor type 2; *TTC33*, tetratricopeptide repeat domain 33; *FUT2*, fucosyltransferase 2; *DNAJC15*, DnaJ heat shock protein family; *LITAF*, lipopolysaccharide induced TNF factor; *CXCR2*, C-X-C Motif Chemokine Receptor 2. Covariates for model 1: sex, residence area, age, weight, education, and income. Covariates for model 2: covariates for model 1 plus smoking, energy intake, alcohol intake and physical exercise.

Supplementary Table S2. Adjusted odds ratio of polygenic risk scores with duodenal ulcer risk

|                               | Low-PRS<br>(n=5912) | Medium-PRS<br>(n=23,471) | High-PRS<br>(n=29,240) | Adjusted OR          |
|-------------------------------|---------------------|--------------------------|------------------------|----------------------|
| WBC (10 <sup>9</sup> /L)      | 5.74±0.02           | 5.69±0.01                | 5.71±0.01              | 0.996 (0.958-1.036)  |
| CRP (mg/dL)                   | 0.13±0.006          | 0.14±0.003               | 0.14±0.003             | 0.963 (0.822-1.129)  |
| BMI (kg/m <sup>2</sup> )      | 23.9±0.04           | 23.9±0.02                | 23.9±0.02              | 1.05 (1 1.009-1.094) |
| Waist (cm)                    | 808±0.11            | 80.6±0.05                | 80.7±0.05              | 1.009 (0.963- 1.058) |
| Metabolic syndrome (N, Yes %) | 802 (14.2)          | 3051 (13.7)              | 3901 (14.1)            | 1.047 (0.991- 1.107) |
| Bronchitis (N, Yes %)         | 43 (7.6)            | 173 (7.8)                | 212 (7.7)              | 1.107 (0.871- 1.408) |
| Asthma (N, Yes %)             | 84 (1.49)           | 373 (1.68)               | 468 (1.70)             | 0.992 (0.859- 1.145) |
| Arthritis (N, %)              | 476 (8.45)          | 1893 (8.52)              | 2393 (8.67)            | 1.007 (0.939- 1.080) |
| Allergy (N, %)                | 375 (6.64)          | 1577 (7.10)              | 1902 (6.89)            | 0.970 (0.901- 1.044) |
| Osteoporosis (N, Yes%)        | 269 (4.78)          | 1135 (5.11)              | 1404 (5.09)            | 0.984 (0.899- 1.076) |
| Gastritis (N, %)              | 540 (9.59)          | 2128 (9.58)              | 2744 (9.94)            | 1.041 (0.977- 1.109) |
| Periodontitis (N, Yes%)       | 365 (6.48)          | 1414 (6.37)              | 1752 (6.35)            | 1.009 (0.934- 1.089) |

The polygenic risk score (PRS) for the best model was generated by summing the number of the risk alleles in each selected genetic variant with the gene-gene interaction model. The PRS of the model was divided into three categories as Low-PRS (PRS<3), Middle-PRS (PRS=3 and 4), and High-PRS (PRS>4). The adjustment with covariates of age, gender, weight at 18 years old, education, income, and residence area, energy intake, alcohol intake, regular exercise, and smoking status.

# Supplementary Figure

Figure S1. The root mean square deviation (RMSD) and root mean square fluctuations (RMSF) of azaspiracid 2 in wild type and mutated CD6 rs11230563 (R225W) during molecular dynamic simulation.

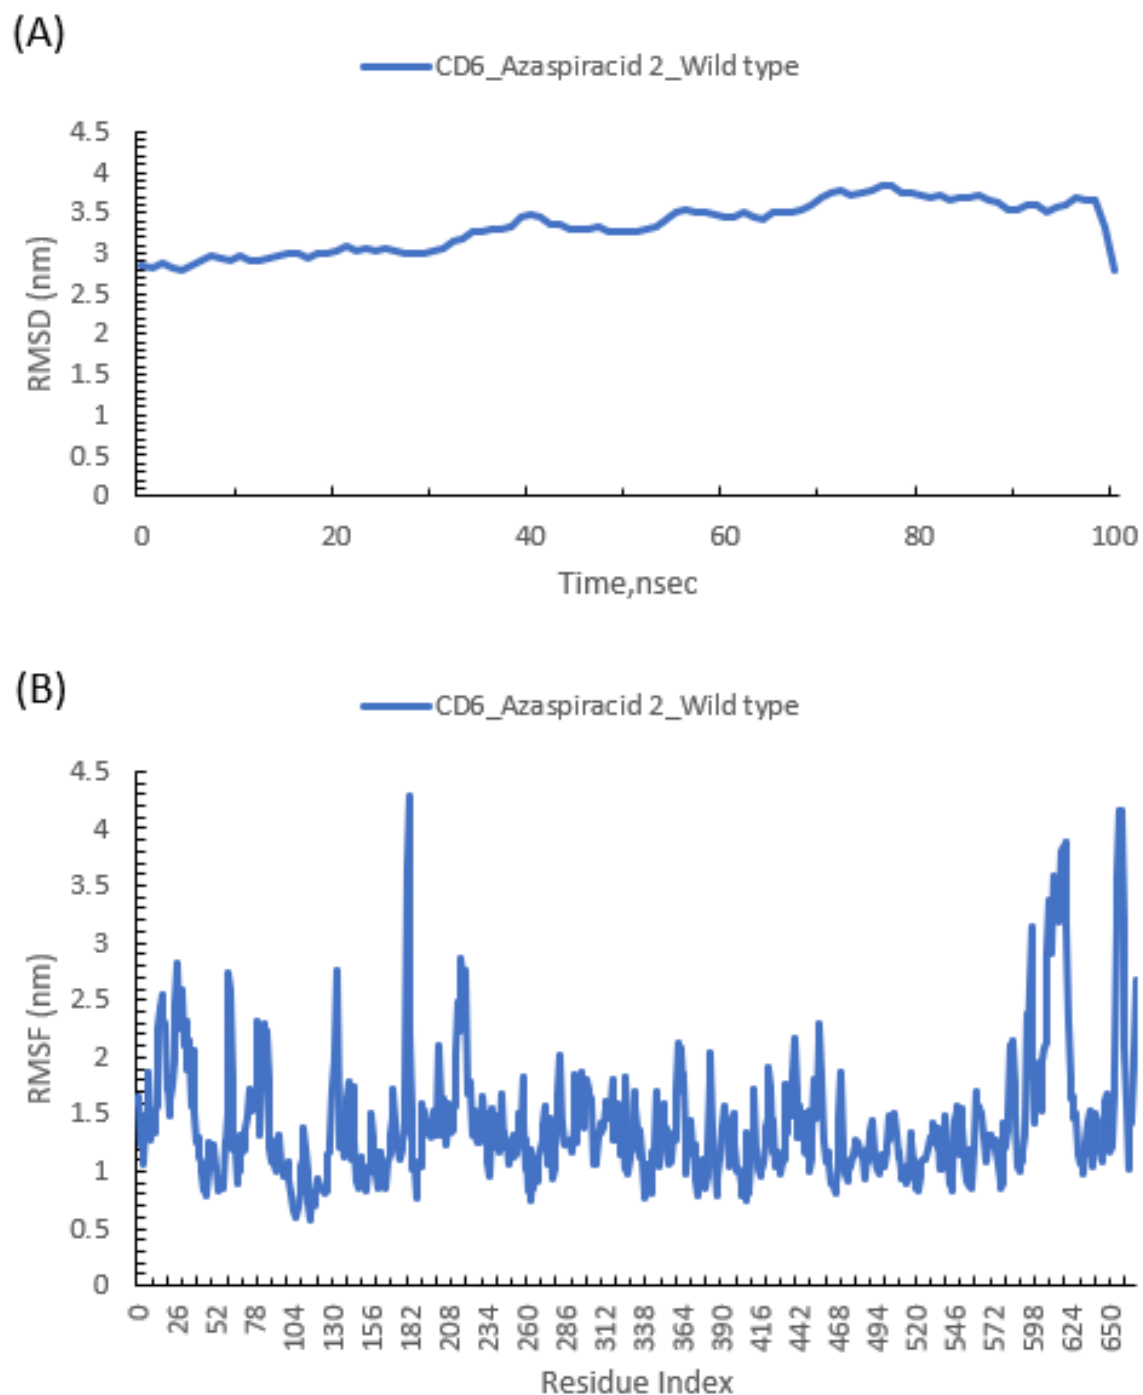

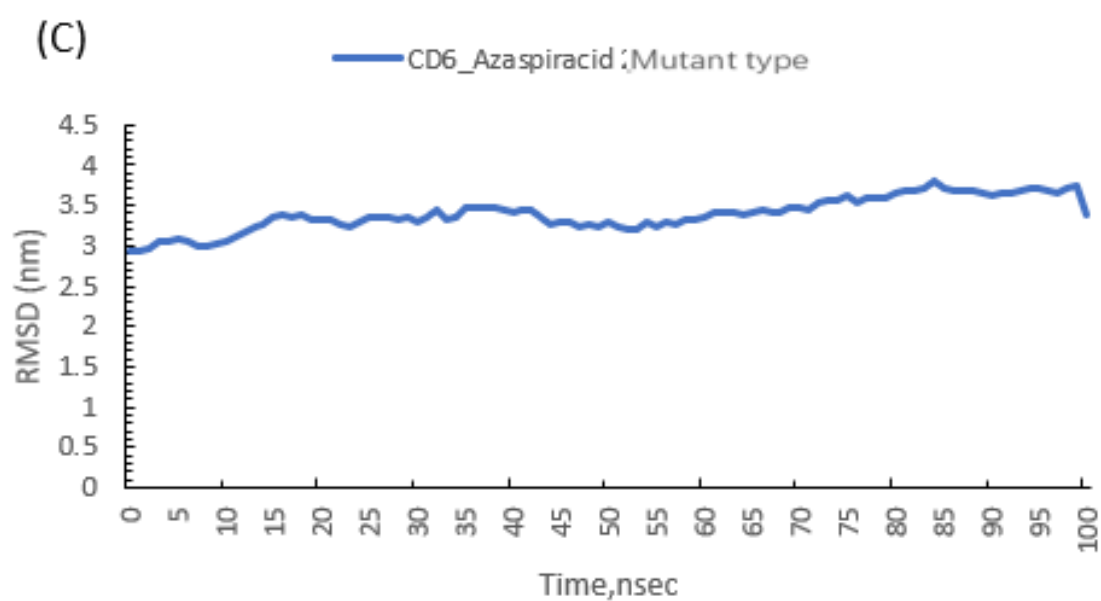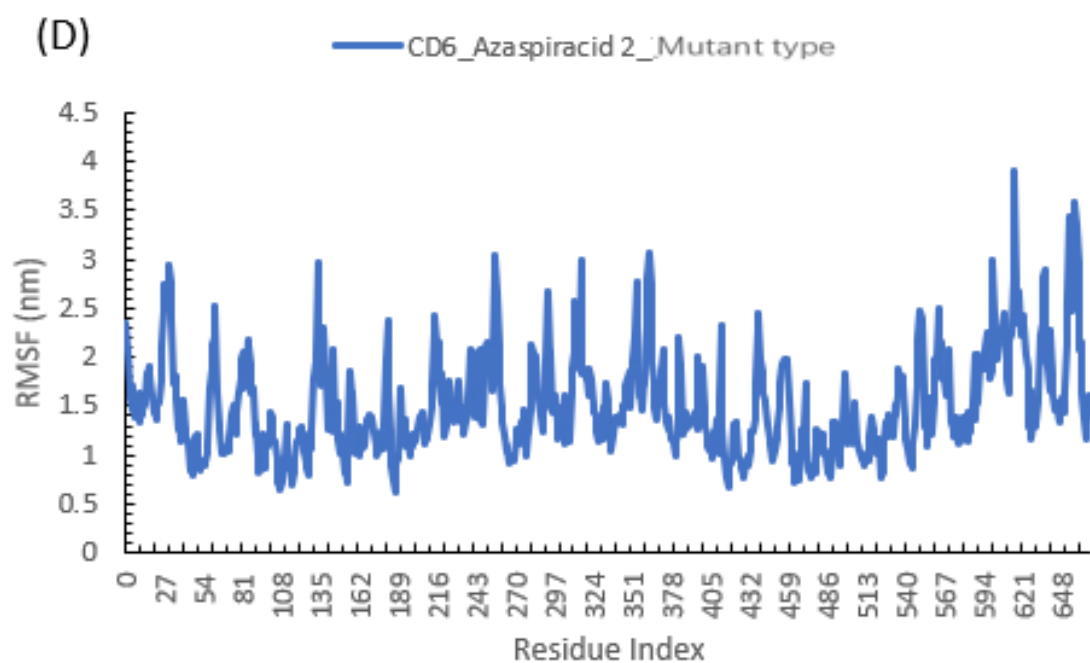

Supplement: s1 [file s1]
